# Supplementary material for: Parboiled Germinated Brown Rice Improves Cardiac Structure and Gene Expression in Hypertensive Rats
Source: MDPI journal article supplement (doi:10.3390/foods12010009), 2022-12-20

# Supplementary Materials

## Parboiled Germinated Brown Rice Improves Cardiac Structure and Gene Expression in Hypertensive Rats

Nattira On-Nom <sup>1</sup>, Kanoknad Khaengamkham <sup>1</sup>, Aikkarach Kettawan <sup>1</sup>, Thanaporn Rungruang <sup>2</sup>,  
Uthaiwan Suttisansanee <sup>1</sup>, Piya Temviriyanyukul <sup>1</sup>, Pattaneeya Prangthip <sup>3</sup> and Chaowanee Chupeerach <sup>1,\*</sup>

<sup>1</sup> Institute of Nutrition, Mahidol University, Salaya, Phuttamonthon, Nakhon Pathom 73170, Thailand

<sup>2</sup> Department of Anatomy, Faculty of Medicine Siriraj Hospital, Mahidol University, Bangkok 10700, Thailand

<sup>3</sup> Department of Tropical Nutrition and Food Science, Faculty of Tropical Medicine, Mahidol University, Ratchathewi, Bangkok 10400, Thailand

\* Correspondence: chaowanee.chu@mahidol.ac.th

### Supplementary Table S1: The condition for rice cooking

Three hundred grams of WR, BR, and PGBR were cooked using an electronic rice cooker, Sharp KS-19ET model, size 1.8 liters (Sharp, Japan). Each steamed rice was cooked under difference conditions. Cooked rice samples were analyzed nutrients and energy (supplementary Table S1). Then, the rice samples were freeze-dried and grinded into rice flour. After that, PGBR, BR, and WR diets were prepared by replacing 15% corn starch in the basal formula diet (AIN 76A) (supplementary Table S2). with freeze-dried cooked PGBR, BR, and WR powders, respectively. The content of each rice added into the diet were based on the macronutrient compositions and energy as displayed in Table S3.

| Rice                                   | Condition for cooking                                                                                                    |
|----------------------------------------|--------------------------------------------------------------------------------------------------------------------------|
| Parboiled germinated brown rice (PGBR) | PGBR was cooked with a 1.0 : 2.3 rice to water ratio, at 100 °C, simmered for 33 min, and set to well-cooked for 15 min. |
| Brown rice (BR)                        | BR was cooked with a 1.0 : 2.2 rice to water ratio, at 100 °C, simmered for 30 min, and set to well-cooked for 15 min.   |
| White rice (WR)                        | WR was cooked with a 1.0 : 1.8 rice to water ratio, at 100 °C, simmered for 15 min, and set to well-cooked for 15 min.   |

### Supplementary Table S2: The compositions of cooked rice powders

| Major composition/100 g                  | WR    | BR    | PGBR  |
|------------------------------------------|-------|-------|-------|
| Energy (Kcal)                            | 382.6 | 389.5 | 389.2 |
| Protein (g)                              | 6.6   | 7.1   | 6.9   |
| Fat (g)                                  | 0.4   | 2.4   | 2.6   |
| Carbohydrate (g)                         | 88.2  | 84.9  | 84.4  |
| $\gamma$ -amino butyric acid (GABA) (mg) | 1.2   | 2.6   | 11.9  |
| $\gamma$ -oryzanol (mg)                  | ND    | 11.4  | 13.3  |
| Total phenolic acid (mg)                 | 8.4   | 37.1  | 69.6  |
| Total vitamin E (mg)                     | ND    | 1.17  | 1.19  |
| Dietary fiber (g)                        | 0.8   | 3.0   | 3.5   |

\*ND = not detected

**Supplementary Table S3:** The compositions of basal formula diet (AIN-76A)

| Diet ingredients    | Percent |
|---------------------|---------|
| Sucrose             | 50      |
| Casein-vitamin free | 20      |
| Corn starch         | 15      |
| Powdered cellulose  | 5       |
| Corn oil            | 5       |
| AIN-76 mineral mix  | 3       |
| AIN-76 vitamin mix  | 1       |
| DL-methionine       | 0.3     |
| Choline bitartrate  | 0.2     |

**Supplementary Table S4:** Primers used for amplification by Real-Time PCR

| Gene           | Forward primer (5'-3')   | Reverse primer (5'-3')   | Annealing temp. (°C) | Amplified length (bp) |
|----------------|--------------------------|--------------------------|----------------------|-----------------------|
| eNOS           | GGGCCAGGGTGATGAGCTCTG    | CCCTCCTGGCTTCCAGTGTCC    | 64                   | 323                   |
| NOX4           | TTGCTTTTGTATCTTC         | CTTACCTTCGTCACAG         | 64                   | 243                   |
| AT1R           | CACCTATGTAAGATCGCTTC     | GCACAATCGCCATAATTATCC    | 64                   | 211                   |
| TGF- $\beta$   | CCGCAACAACGCAATCTATG     | AGCCCTGTATTCCGTCTCCTT    | 64                   | 304                   |
| Col I          | TCAGGGGCGAAGGCAACAGT     | TTGGGATGGAGGGAGTTTACACGA | 64                   | 218                   |
| Col III        | CGTCCTGCAGGTAACAGTGGTTC  | TGCTCCAGTTAGCCCTGCAA     | 64                   | 148                   |
| SOD            | CGTCATTCACTTCGAGCAGAAGG  | GTCTGAGACTCAGACCACATA    | 64                   | 443                   |
| CAT            | ACAACTCCCAGAAGCCTAAGAATG | GCTTTTCCCTTGGCAGCTATG    | 58                   | 76                    |
| GPx            | GGAGAATGGCAAGAATGAAGA    | CCGCAGGAAGGTAAAGAG       | 60                   | 138                   |
| $\beta$ -actin | TGGCTCATCGTAGGGAGTTT     | CTCGTCCTCGACTGAGAAGC     | 64                   | 121                   |

**Supplementary Figure S1:** Diet consumption in all animal groups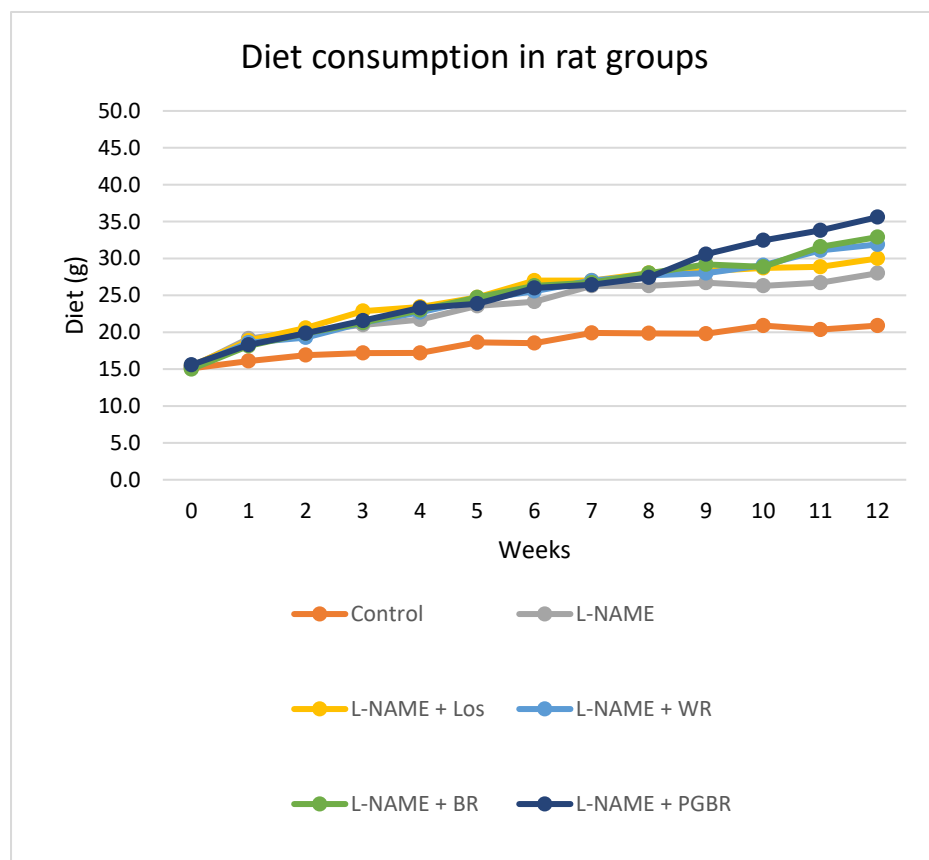

Supplement: s1 [file s1]
